1  
2  
3  
4  
5  
6  
7  
8  
9  
10  
11  
12  
13  
14  
15  
16  
17  
18  
19  
20  
21  
22  
23  
24

## Trade-off between plasticity and velocity in mycelial growth

Sayumi Fukuda<sup>1 †</sup>, Riho Yamamoto<sup>1†</sup>, Naoki Yanagisawa<sup>2‡</sup>, Naoki Takaya<sup>1</sup>, Yoshikatsu Sato<sup>2</sup>,  
Meritxell Riquelme<sup>3</sup>, Norio Takeshita<sup>1\*</sup>

<sup>1</sup> Microbiology Research Center for Sustainability (MiCS), Faculty of Life and Environmental  
Sciences, University of Tsukuba, 305-8572, Japan

<sup>2</sup> Institute of Transformative Bio-Molecules (WPI-ITbM), Nagoya University, Furo-cho,  
Chikusa-ku, Nagoya, Aichi, 464-8601, Japan

<sup>3</sup> Centro de Investigación Científica y de Educación Superior de Ensenada, CICESE, Baja  
California, 22860, Mexico

\*Correspondence to: Norio Takeshita, [takeshita.norio.gf@u.tsukuba.ac.jp](mailto:takeshita.norio.gf@u.tsukuba.ac.jp)

† Equal contribution

‡ Current address, Department of Mechanical and Process Engineering (D-MAVT), ETH  
Zurich, Säumerstrasse 4, CH-8803 Rüschlikon, Switzerland

Keywords; cell polarity, growth rate, microfluidic device, hyphae, filamentous fungi

25 **Abstract**

26 Tip-growing fungal cells maintain the cell polarity at the apical regions and elongate by de  
27 novo synthesis of cell wall. Cell polarity and growth rate affect the mycelial morphogenesis,  
28 however, it remains unclear how they act cooperatively to determine cell shape. Here we  
29 investigated their relationship by analyzing hyphal tip growth of filamentous fungi growing  
30 inside extremely narrow 1  $\mu\text{m}$ -width channels of microfluidic devices. Since the channels are  
31 much narrower than the diameter of hyphae, the hyphae must change its morphology when  
32 they grow through the channels. Live imaging analysis revealed that hyphae of some species  
33 continued growing through the channels, whereas hyphae of other species often ceased  
34 growing when passing through the channels or lost the cell polarity after emerging from the  
35 channels. Fluorescence live imaging analysis of the Spitzenkörper, a collection of secretory  
36 vesicles and polarity-related proteins at hyphal tips, in *Neurospora crassa* hyphae indicates  
37 that hyphal tip growth requires a very delicate balance of ordered exocytosis to maintain  
38 polarity in spatially confined environments. We analyzed the mycelial growth of seven fungal  
39 species from different lineages, which also include phytopathogenic fungi. This comparative  
40 cell biology showed that the growth defects in the channels were not correlated with their  
41 taxonomic classification nor with the width of hyphae, but, correlated with the hyphal  
42 elongation rate. This is the first report indicating a trade-off between plasticity and velocity  
43 in mycelial growth, and serves to understand fungal invasive growth into substrates or  
44 plant/animal cells, with direct impact on fungal biotechnology, ecology and pathogenicity.

45

46

47

48

## 49 **Introduction**

50 Cell morphogenesis, which is controlled by cell polarity and cell growth, is fundamental for all  
51 cellular functions (1,2). The core cell polarity machinery appears to be relatively conserved in  
52 animals, plants, and fungi (3, 4). First, polarity signaling complexes assemble near a cell-  
53 surface landmark, and locally assemble the cytoskeleton through actin or tubulin  
54 polymerization. Then, directed trafficking of vesicles and carriers contribute to local  
55 membrane and cell wall expansion. In addition, cell growth is controlled by turgor pressure,  
56 which drives the expansion of the cell membrane, especially in cell types covered by a cell  
57 wall (5,6). Although both polarity and growth are essential for cell morphogenesis, how  
58 growth speed and cell polarity cooperatively control cell shape remains unclear.

59         Filamentous fungi grow as highly polarized tubular cells by elongation of their primary  
60 hyphae and branches at the tips (7). The tip-growing fungal cells maintain polarity at the apical  
61 regions, where they elongate by supply of membrane lipids and de novo synthesis of cell wall  
62 (8-11). The necessary proteins and lipids are delivered to the tip by vesicle trafficking via the  
63 actin and microtubule cytoskeletons and their corresponding motor proteins (12-16). The  
64 delivered secretory vesicles accumulate temporarily in an apical vesicle cluster, called the  
65 Spitzenkörper (SPK; 17-19). Vesicle exocytosis at the apical membrane allows release of  
66 secretory enzymes and the expansion of apical membrane and cell wall. Recent live imaging  
67 analyses including super-resolution microscopy have revealed that the multiple steps in  
68 polarized growth, such as the assembly of polarity markers, actin polymerization, and  
69 exocytosis, are temporally coordinated through pulsed  $\text{Ca}^{2+}$  influxes (20-22).

70         While tip growth rate depends on the supply of vesicles, it has been reported that  
71 turgor pressure is one of the major forces driving the expansion at the hyphal tip (6). Turgor  
72 pressure in growing hyphae has been directly measured by using microinjection with pressure

73 probe (23). Cytoplasmic bulk flow, which is evident in fast growing fungi like *Neurospora*  
74 *crassa*, is also involved in the force to expand the hyphal tip (6, 24).

75 Microfluidic devices-based technology has been used to study the behavior of tip-  
76 growing plant cells (25-27) and, more recently, of filamentous fungi (28, 29). An elastic  
77 polydimethylsiloxane (PDMS) microfluidic device enabled to measure the invasive pressure  
78 of tip-growing plant pollen tubes (30). Likewise, scanning probe microscopy (SPM), with a  
79 sensor probe that directly indents the cellular surface, is available for measurement of cellular  
80 stiffness in a non-invasive manner (31). These methods in combination with cell biology are  
81 powerful tools to investigate the mechanical properties in living cells.

82 Here we constructed a microfluidic device with 1 $\mu$ m-width channels, which are  
83 narrower than the diameter of fungal hyphae, and observed growth as hyphae grew into,  
84 through and out of the channels (Fig. 1A). The present study aimed to identify the relationship  
85 between cell polarity and growth rate by observing the forced morphological changes of  
86 growing hyphae under a microscope. Our results would help to understand fungal invasive  
87 growth into substrates or host plant/animal cells, and apply that knowledge to the fields of  
88 fungal biotechnology, ecology and pathogenicity.

89

## 90 **Results**

### 91 ***A. nidulans* and *A. oryzae* but not *N. crassa* hyphae grow through the channels.**

92 The PDMS microfluidic device used in this study possesses multiple micro channels, 1  $\mu$ m wide  
93 and 50 or 100  $\mu$ m long (Fig. 1A). Fungal spores were inoculated at the center of the device,  
94 "IN". The medium solution was continuously supplied to the inlet "IN" with the help of a pump  
95 (0.8  $\mu$ l per hour) and flowed out from the four outlet "OUT" corners.

96 We monitored the hyphal growth of *Aspergillus nidulans* as it grew into, through and  
97 out of the channels. We used a strain whose nuclei were visualized by GFP, nuclear  
98 localization signal of the transcription factor StuA tagged with GFP (32). The hyphal widths  
99 were 2-3  $\mu\text{m}$  before entering the channel under this condition. All observed hyphae grew into  
100 the channels, passed through them and continued to grow ( $50 < n$ ) (Fig. 1B, S1A, Movie S1).  
101 The kymograph along the growth axis indicated comparable growth rate,  $37 \pm 15 \mu\text{m}/\text{h}$  ( $n=20$ ),  
102 before, through (Fig. 1B) and after the channels (Fig. S1A). In some cases, two or three hyphae  
103 passed through the same channel (Fig. S1B, Movie S1). In the same way, we tested *Aspergillus*  
104 *oryzae*, which is important for traditional food fermentation and modern biotechnology (33).  
105 We used a strain in which histone H2B is fused with GFP (34). Again, all observed hyphae went  
106 into the channels, passed through there and continued to grow without growth rate decrease  
107 ( $84 \pm 37 \mu\text{m}/\text{h}$ ,  $n=30$ ) (Fig. 1C, Movie S2).

108 We examined another model filamentous fungus, *Neurospora crassa*, whose hyphae  
109 usually grow faster and have a larger diameter than those in *A. nidulans* (7, 35)(see below).  
110 We used a strain in which histone H1 is fused with GFP (36). Some hyphae penetrated into  
111 the channels but often their growth speed slowed down and stopped before reaching the end  
112 of the channel (Fig. 1D arrows, Movie S3). The hyphae that passed through channels  
113 frequently lost polarized growth and started to swell (Fig. 1D asterisks, Movie S3). The de-  
114 polarized hyphae stopped growing after a while, then lost the GFP signal of nuclei (Movie S3).  
115 The growth arrest inside the channels and the loss of polarity of the hyphae after exiting the  
116 channels were characteristic of *N. crassa* but not of *A. nidulans* or *A. oryzae* (Fig. 1E, F). A 33 %  
117 of *N. crassa* hyphae grew out of the channel without losing the cell polarity (Fig. 1E,  $n=50$ ). In  
118 addition, the *N. crassa* spores that were trapped in front of the channels frequently

119 germinated to the opposite side of channels (Fig. S1C), but not in the case of *A. nidulans* or *A.*  
120 *oryzae* (Fig. S1D).

121

## 122 **Cell polarity loss after forced morphological changes in *N. crassa***

123 We investigated the cell polarity in *N. crassa* hyphae growing in the channels by monitoring  
124 GFP tagged CHS-1 (chitin synthase class III) at the SPK (37). Accumulation of GFP-CHS-1 at the  
125 SPK was clearly observed at the tips of growing hyphae before growing into the channels (Fig.  
126 2A, Fig. S1E, Movie S4). The hyphae penetrated into the channels then stopped growing,  
127 coinciding with a loss of the GFP signal at the SPK, and dispersion of the fluorescence signal  
128 along the cytoplasm of the tip region with high intensity level of GFP (Fig. 2A, B, Fig. S1D).  
129 Distinct accumulation of GFP-CHS-1 at the SPK was hardly observed in the hyphae growing  
130 within the channels (Fig. 2C). In the de-polarized swollen hyphae exiting the channel, the  
131 fluorescence signal was diffused and weak, but became visible again at the SPK of the multiple  
132 branches that formed when polarized growth resumed (Fig. 2D arrows, Movie S5). The  
133 kymograph along the growth axis indicated comparable growth rate before and in the  
134 channels, 200 and 245  $\mu\text{m}/\text{h}$ , however the hypha drastically decreased the growth rate after  
135 exiting the channel (Fig. 2E).

136 CHS-1-GFP is also known to localize at septa during their formation (37). We found  
137 that the de-polarized hyphae possessed two-times more septa within the narrow channels  
138 than the hyphae that successfully passed through the channels without presenting polarity  
139 defects (Fig. S2A-C), suggesting that the cell cycle progresses and deposition of cross walls  
140 continues when tip growth is inhibited.

141

## 142 **Relationship between growth rate and polarity maintenance**

143 We tested two plant pathogenic fungi, *Fusarium oxysporum* and *Colletotrichum orbiculare* (38,  
144 39), using the same microfluidic devices. Since the plant pathogenic fungal hyphae have to  
145 invade between tightly connected plant cells, polarity maintenance in spatially confined  
146 growth should be important for their pathogenicity. Almost all the hyphae of *F. oxysporum*  
147 and *C. orbiculare* grew into and passed through the channels while maintaining the growth  
148 rate ( $83 \pm 27 \mu\text{m/h}$  and  $91 \pm 16 \mu\text{m/h}$ ,  $n=53, 45$ , respectively) (Fig. 3A, Movie S6, 7).

149 To investigate the reason why only *N. crassa* but not the other fungi showed growth  
150 defects in spatially confined growth that they were subjected to in the channels, we  
151 compared the widths of hyphae and hyphal elongation rates of all fungi grown in the device  
152 (Fig. 3B). The results corresponding to before entering and after exiting the channels are  
153 shown in dark and bright colors, respectively. The hyphal widths in *A. nidulans* were 2-3  $\mu\text{m}$ ,  
154 whereas those in *N. crassa*, *F. oxysporum* and *C. orbiculare* were 3-4  $\mu\text{m}$ , and those in *A.*  
155 *oryzae* were slightly wider. These results suggest that the hyphal widths are not correlated to  
156 the growth defect shown in the channels. There is no significant difference in the the hyphal  
157 widths between before entering and after exiting the channels except *A. oryzae*. It is known  
158 that *A. oryzae* increases hyphal width as cultivation time passes (34). Since the widths in  
159 mature hyphae of *N. crassa* are known to be over 10  $\mu\text{m}$ , the hyphae we observed in this  
160 condition were considered as young hyphae.

161 In contrast, the hyphal elongation rate in *A. nidulans* was less than 50  $\mu\text{m/h}$ , whereas  
162 those in *A. oryzae*, *F. oxysporum* and *C. orbiculare* were 50-100  $\mu\text{m/h}$  (Fig. 3B, lower graph).  
163 Notably, the hyphal elongation rate in *N. crassa* was 150-250  $\mu\text{m/h}$ , higher than that of the  
164 other fungi.

165 To examine the relationship between growth rate and growth defect in the channels,  
166 we tested also *Rhizopus oryzae* and *Coprinopsis cinerea* dikaryon, whose hyphal elongation

167 rates are known to be relatively high (40, 41). The hyphal elongation rates of *R. oryzae* and *C.*  
168 *cinerea* in the device were 100-250  $\mu\text{m}/\text{h}$  (Fig. 3B), whereas the hyphal widths were 3-5  $\mu\text{m}$ ,  
169 indicating certainly that these two fungi grow faster than the other fungi, and similar to *N.*  
170 *crassa*. At least one hypha penetrated into one channel, however the hyphae of *R. oryzae* and  
171 *C. cinerea* often stopped growing in or shortly after exiting the channels (Fig. 3C, D, Movie S8,  
172 9). De-polarized hyphae were sometimes observed after exiting the channels in *R. oryzae*  
173 similarly to what was observed for *N. crassa* (Fig. 3C, E). We tested various fungal species of  
174 different phylogenetic lineages (40), however the observed output did not correlate with the  
175 phylogenetic distance (Fig. S3A). Altogether these results indicated that neither phylogenetic  
176 relevance nor the width of hyphae were correlated with the growth defect in the channels.  
177 In contrast, the hyphal elongation rate displayed a strong correlation with the growth defects  
178 in the channels (Fig. 3F, Fig. S3B, C).

179

#### 180 **Contribution of turgor pressure for polarity maintenance.**

181 Why do hyphae of *N. crassa* and *R. oryzae* generally grow faster than those of *A. nidulans* and  
182 other species? One possibility points to the fact that *N. crassa* and *R. oryzae* hyphae have  
183 higher turgor pressure. This is supported by the results showing that both *N. crassa* and *R.*  
184 *oryzae* were sensitive to the high osmotic condition generated by addition of 0.6 M KCl,  
185 resulting in decrease of turgor pressure (Fig. 4A and Fig. S3D). In contrast, *A. nidulans*, *A.*  
186 *oryzae*, and *F. oxysporum* were not sensitive to the high osmotic condition.

187 Indeed, we measured the elastic modulus, that represent forces balanced in the  
188 opposite direction of turgor pressure, by using a scanning probe microscope (SPM). The SPM  
189 scanned sample surfaces with an extremely sharp sensor probe and measured the physical  
190 property of fungal cells in a non-invasive manner at high magnifications (Fig. S4). The elastic



191 modulus in *N. crassa* hyphae,  $278 \pm 98$  kPa, were significantly higher than those in *A. nidulans*,  
192 *A. oryzae*, and *F. oxysporum* (Fig. 4B), indicating that the turgor pressure in *N. crassa* is higher  
193 than those in others.

194 In order to decrease the turgor pressure in hyphae of *N. crassa* grown in the device,  
195 *N. crassa* was grown in the high osmotic condition with 0.6 M KCl. The hyphal elongation rate  
196 just before the channels decreased in high osmotic condition from  $239 \pm 50$  to  $151 \pm 21$   $\mu\text{m}/\text{h}$   
197 (Fig. 4C), whereas the hyphal widths increased from  $3.8 \pm 0.7$  to  $5.2 \pm 1.0$   $\mu\text{m}$  (Fig. 4D). Notably,  
198 the ratio of hyphae that passed through the channels increased from 33 to 75% in the high  
199 osmotic condition (Fig. 4E), which is correlated with the decreased hyphal elongation rate (Fig.  
200 3F, Nc + KCl). Although 25% hyphae still stopped growing in the channels, de-polarized hyphae  
201 were not observed (Fig. S3B). We compared the hyphal elongation rate just before the  
202 channels in the hyphae that passed or failed to pass, and found that hyphal elongation rate is  
203 lower in the hyphae that passed the channels than that in the hyphae failed to pass in normal  
204 and high osmotic conditions (Fig. 4F).

205 Under the high osmotic condition, the SPK labelled by GFP-CHS-1 was clearly observed  
206 at the tips of growing hyphae even in the channels (Fig. 4G, Fig. S5, Movie S10). Although the  
207 hypha swelled slightly when exiting the channel (Fig. 4G right, asterisk, Movie S10), the hypha  
208 grew into and passed through the channels while maintaining the growth rate (Fig. 4G right,  
209 arrows). These results indicate that the growth rate is important for the maintenance of cell  
210 polarity in spatially confined growth derived from passing squeezed through the channels (Fig.  
211 5).

212

213

214

## 215 **Discussion**

216 This study showed that hyphae from several fungal species of different phylogenetic lineages  
217 were able to grow into microchannels narrower than their width, as described before for  
218 plant tip-growing cells (27). It was first found that hyphae of *N. crassa*, *R. oryzae*, and *C.*  
219 *cinerea*, either ceased growing when passing through the channels or became de-polarized  
220 upon exiting the channels. The observed effects did not correlate with their taxonomic  
221 classification nor with the width of hyphae, but correlated with the hyphal elongation rate.  
222 Fast-growing fungi possess the advantage of covering quickly new nutrient-rich substrates or  
223 free open spaces. However, at the same time, they may lack the ability to regulate cell shape  
224 properly when growing in spatially confined environments. As far as we know this is the first  
225 report indicating a trade-off between growth rate and morphogenesis, that suggests the  
226 significance of slow growth for the cooperative control of cell polarity and cell growth. This  
227 characteristic is considered a case of convergent evolution given the fact that each fungus  
228 possesses a similar morphology and physiology adapted to different environmental factors  
229 even if they are phylogenetically distant. It will be fascinating in the near future to study  
230 whether a similar relationship is observed in other tip-growing cells such as pollen tubes and  
231 root hairs of different plant species.

232 Our results indicate that hyphal tip growth requires a very delicate balance of ordered  
233 exocytosis to maintain polarity under spatially constrained circumstances. In fast growing  
234 hyphae, such as *N. crassa*, a large number of secretory vesicles are presumably supplied to  
235 the hyphal tips, resulting in a conspicuous SPK (43). When fast growing hyphae enter into the  
236 narrow channels, a massive number of vesicles is forced to be congregated in the tip region.  
237 The cytoplasmic space in those thin hyphae is likely too small for all the secretory vesicles to  
238 fit in the tip region. The space constrains probably cause the excess of secretory vesicles to

239 mislocalize at sites others than the tip region, resulting in the de-polarized growth and tip  
240 swelling when exiting the channels (Fig. 5). In fact, the lack of localization of some vesicular  
241 markers such as CHS-1 at the tip and the dispersed fluorescence observed instead when *N.*  
242 *crassa* hyphae grew through the channels, supports the idea than an excess of vesicles is  
243 accumulating in a non-organized manner at the subapical region. When the hyphae are forced  
244 to grow through a very narrow channel, under a high turgor pressure, yet maintaining the  
245 same growth speed, all the cell-wall building machinery accumulates at the subapical region.  
246 Upon exiting the channel, all the machinery gets incorporated in an uncontrolled manner  
247 isotropically at the tip, thus generating a swollen tip. After that, new polarity axes get  
248 established and growth resumes in the form of multiple branches. In the case of *A. nidulans*  
249 even if the hyphae are squeezed when entering the channel, the vesicles, presumably less  
250 abundant, manage to continue their flow, spacing, movement and grow is non-affected  
251 through passage and upon exiting the channel (Fig. 5).

252         Filamentous fungi play a major role in degradation of biopolymers found in nature for  
253 organic material recycling (44, 45). Some fungi are useful in biotechnology and traditional  
254 food fermentation (33, 46), where especially solid-state cultivation is important (47). Hyphal  
255 invasive growth into the host plant/animal cells is essential for pathogenicity and symbiosis  
256 with plant roots as well (38, 48, 49). Our results help to understand the mechanisms of fungal  
257 invasive growth into substrates or host cells by spatially confined growth, how cell  
258 morphology is controlled by cell polarity and cell growth, that is closely related to fungal  
259 biotechnology, ecology and pathogenicity.

260

261

262

263

## 264 **Materials and Methods**

265 **Fungal strains and media.** A list of filamentous fungi strains used in this study is given in Table

266 S1. Supplemented minimal medium for *A. nidulans* and standard strain construction  
267 procedures are described previously (50).

268 **Microfluidic device.** The microfluidic devices originally designed for culturing tip-growing  
269 plant cells and reported by Yanagisawa. et. al (27) were adapted for the current fungal cells  
270 studies. Briefly, photoresist (SU-8 3005 & 3010) based microstructures were created on a  
271 silicon wafer using a maskless lithography system (DL-1000; Nano System Solutions, Inc.).

272 Then, Polydimethylsiloxane (PDMS, Sylgard 184; Dow Corning) device was prepared through  
273 a standard soft-lithography technique. Finally, the PDMS and cover glass (24x60 mm,  
274 Matsunami) were both treated with O<sub>2</sub> plasma (CUTE, Femto Science) for permanent bonding.

275 **Growth condition.** The minimal medium was filled in 20 ml plastic syringe (SS-20ESZ, Terumo)  
276 and infused into the PDMS devices using a positive displacement syringe pump (YSP-101,  
277 YMC) at a rate of 0.8  $\mu$ l per hour through a polyethylene tube (Inner diameter 0.38 mm, outer  
278 diameter 1.09 mm, BD intramedic).

279 **Microscopies.** Cells were observed by using an epi-fluorescent inverted microscopy, Axio  
280 Observer Z1, (Carl Zeiss) microscope equipped with a Plan-Apochromat 63  $\times$  1.4 Oil or 10 or  
281 20 times objective lens, an AxioCam 506 monochrome camera and Colibri.2 LED light (Carl  
282 Zeiss). Temperature of the stage was kept at 30°C by a thermo-plate (TOKAI HIT, Japan).

283 Images were collected and analyzed by using the Zen system (Carl Zeiss) and ImageJ software.

284 **Scanning probe microscope.** Cells were grown in the minimal medium on cover slips at 30°C  
285 for 24 h. The medium was removed by pipetting then, the cells were analyzed by using a  
286 scanning probe microscope SPM-9700HT (Shimadzu) with high magnification optical

287 microscope unit, active vibration isolation table, wide area scanner (XY: 125  $\mu\text{m}$ , Z: 5  $\mu\text{m}$ ), and  
288 fiber light. Images were collected and analyzed by using Nano 3D mapping software  
289 (Shimadzu).

290

291

## 292 **Acknowledgements**

293 We thank Dr. A. Kogure for the SPM technical assistance, Prof. Y. Kubo for sharing the *C.*  
294 *orbiculare* strain, Prof. H. Muraguchi for sharing the *C. cinerea* strain. This work was supported  
295 by the Japan Society for the Promotion of Science KAKENHI Grant (18K05545 to N.T.,  
296 19H05364, 20H05412 to Y.S., 18J01077 to N.Y.), Ohsumi Frontier Science Foundation to N.T.  
297 and Y.S., and the Japan Science and Technology Agency Exploratory Research for Advanced  
298 Technology (ERATO) Grant JPMJER1502.

299

## 300 **Author contributions**

301 N. Takeshita and Y.S. designed research; S.F., R.Y., and N. Takeshita performed research; N.Y.,  
302 N. Takaya, Y.S. and M.R. contributed new reagents/analytic tools; S.F., R.Y., and N. Takeshita  
303 analyzed data; and Y.S., M.R. and N. Takeshita wrote the paper.

304

305

306

307 **References**

- 308 1. Asnacios A, Hamant O. The mechanics behind cell polarity. *Trends in Cell Biol.* **22**, 584-591  
309 (2012).
- 310 2. Howard J, Grill SW, Bois JS. Turing's next steps: the mechanochemical basis of  
311 morphogenesis. *Nat. Rev. Mol. Cell Biol.* **12**, 392-398 (2011).
- 312 3. Campanale JP, Sun TY, Montell DJ. Development and dynamics of cell polarity at a glance.  
313 *J. Cell Sci.* **130**, 1201-1207 (2017).
- 314 4. Etienne-Manneville S. Cdc42 - the centre of polarity. *J. Cell Sci.* **117**, 1291-1300 (2014).
- 315 5. Zhao F, Chen W, Traas J. Mechanical Signaling in Plant Morphogenesis. *Curr. Opin. Genet.*  
316 *Dev.* **51**, 26-30 (2018).
- 317 6. Lew RR. How does a hypha grow? The biophysics of pressurized growth in fungi. *Nat. Rev.*  
318 *Microbiol.* **9**, 509-18 (2011).
- 319 7. Riquelme M, Aguirre J, Bartnicki-García S, Braus GH, Feldbrügge M, Fleig U, Hansberg W,  
320 Herrera-Estrella A, Kämper J, Kück U, Mouriño-Pérez RR, Takeshita N, Fischer R. Fungal  
321 Morphogenesis, from the Polarized Growth of Hyphae to Complex Reproduction and  
322 Infection Structures. *Microbiol. Mol. Biol. Rev.* **82**, e00068-17 (2018).
- 323 8. Taheri-Talesh N, Horio T, Araujo-Bazán L, Dou X, Espeso EA, Peñalva MA, Osmani SA, Oakley  
324 BR. The tip growth apparatus of *Aspergillus nidulans*. *Mol. Biol. Cell* **19**, 1439–1449  
325 (2008).
- 326 9. Takeshita N, Higashitsuji Y, Konzack S, Fischer R. Apical sterol-rich membranes are essential  
327 for localizing cell end markers that determine growth directionality in the filamentous  
328 fungus *Aspergillus nidulans*. *Mol. Biol. Cell* **19**, 339–351 (2008).

- 329 10. Fischer R, Zekert N, Takeshita N. Polarized growth in fungi—Interplay between the  
330 cytoskeleton, positional markers and membrane domains. *Mol. Microbiol.* **68**, 813–  
331 826 (2008).
- 332 11. Riquelme M, Yarden O, Bartnicki-Garcia S, Bowman B, Castro-Longoria E, Free SJ, Fleissner  
333 A, Freitag M, Lew RR, Mouriño-Pérez R, Plamann M, Rasmussen C, Richthammer C,  
334 Roberson RW, Sanchez-Leon E, Seiler S, Watters MK. Architecture and development  
335 of the *Neurospora crassa* hypha -- a model cell for polarized growth. *Fungal. Biol.* **115**,  
336 446-74 (2011).
- 337 12. Egan MJ, McClintock MA, Reck-Peterson SL. Microtubule-based transport in filamentous  
338 fungi. *Curr. Opin. Microbiol.* **15**, 637-45 (2012).
- 339 13. Steinberg G. Endocytosis and early endosome motility in filamentous fungi. *Curr. Opin.*  
340 *Microbiol.* **20**, 10-8 (2014).
- 341 14. Pantazopoulou A, Pinar M, Xiang X, Peñalva MA. Maturation of late Golgi cisternae into  
342 RabE (RAB11) exocytic post-Golgi carriers visualized *in vivo*. *Mol. Biol. Cell.* **25**, 2428-  
343 43 (2014).
- 344 15. Peñalva MA, Zhang J, Xiang X, Pantazopoulou A. Transport of fungal RAB11 secretory  
345 vesicles involves myosin-5, dynein/dynactin/p25, and kinesin-1 and is independent of  
346 kinesin-3. *Mol. Biol. Cell.* **28**, 947-961 (2017).
- 347 16. Zhou L, Evangelinos M, Wernet V, Eckert AF, Ishitsuka Y, Fischer R, Nienhaus GU, Takeshita  
348 N. Superresolution and pulse-chase imaging reveal the role of vesicle transport in  
349 polar growth of fungal cells. *Sci. Adv.* **4**, e1701798 (2018).
- 350 17. Riquelme M, Bredeweg EL, Callejas-Negrete O, Roberson RW, Ludwig S, Beltrán-Aguilar A,  
351 Seiler S, Novick P, Freitag M. The *Neurospora crassa* exocyst complex tethers

- 352 Spitzkörper vesicles to the apical plasma membrane during polarized growth. *Mol.*  
353 *Biol. Cell.* **25**, 1312-26 (2014).
- 354 18. Riquelme M, Sánchez-León E. The Spitzenkörper: a choreographer of fungal growth and  
355 morphogenesis. *Curr. Opin. Microbiol.* **20**, 27-33 (2014).
- 356 19. Zheng P, Nguyen TA, Wong JY, Lee M, Nguyen TA, Fan JS, Yang D, Jedd G. Spitzenkörper  
357 assembly mechanisms reveal conserved features of fungal and metazoan polarity  
358 scaffolds. *Nat. Commun.* **11**, 2830 (2020).
- 359 20. Takeshita N, Evangelinos M, Zhou L, Serizawa T, Somera-Fajardo RA, Lu L, Takaya N,  
360 Nienhaus GU, Fischer R. Pulses of Ca<sup>2+</sup> coordinate actin assembly and exocytosis for  
361 stepwise cell extension. *Proc. Natl. Acad. Sci. U. S. A.* **114**, 5701-5706 (2017).
- 362 21. Ishitsuka Y, Savage N, Li Y, Bergs A, Grün N, Kohler D, Donnelly R, Nienhaus GU, Fischer R,  
363 Takeshita N. Superresolution microscopy reveals a dynamic picture of cell polarity  
364 maintenance during directional growth. *Sci. Adv.* **1**, e1500947 (2015).
- 365 22. Takeshita N. Coordinated process of polarized growth in filamentous fungi. *Biosci.*  
366 *Biotechnol. Biochem.* **80**, 1693-9 (2016).
- 367 23. Lew RR, Levina NN, Walker SK, Garrill A. Turgor regulation in hyphal organisms. *Fungal.*  
368 *Genet. Biol.* **41**, 1007-1015 (2004).
- 369 24. Ramos-García SL, Roberson RW, Freitag M, Bartnicki-García S, Mouriño-Pérez RR.  
370 Cytoplasmic bulk flow propels nuclei in mature hyphae of *Neurospora crassa*. *Eukaryot.*  
371 *Cell.* **8**, 1880-90 (2009).
- 372 25. Agudelo C, Packirisamy M, Geitmann A. Influence of Electric Fields and Conductivity on  
373 Pollen Tube Growth assessed via Electrical Lab-on-Chip. *Sci. Rep.* **6**, 19812 (2016).



- 374 26. Agudelo CG, Sanati Nezhad A, Ghanbari M, Naghavi M, Packirisamy M, Geitmann A.  
375 TipChip: a modular, MEMS-based platform for experimentation and phenotyping of  
376 tip-growing cells. *Plant J.* **73**, 1057-68 (2013).
- 377 27. Yanagisawa N, Sugimoto N, Arata H, Higashiyama T, Sato Y. Capability of tip-growing plant  
378 cells to penetrate into extremely narrow gaps. *Sci. rep.* **7**, 1403 (2017).
- 379 28. Thomson DD, Wehmeier S, Byfield FJ, Janmey PA, Caballero-Lima D, Crossley A, Brand AC.  
380 Contact-induced apical asymmetry drives the thigmotropic responses of *Candida*  
381 *albicans* hyphae. *Cell Microbiol.* **17**, 342-54 (2015).
- 382 29. Held M, Kašpar O, Edwards C, Nicolau DV. Intracellular mechanisms of fungal space  
383 searching in microenvironments. *Proc. Natl. Acad. Sci. U. S. A.* **116**, 13543-13552  
384 (2019).
- 385 30. Ghanbari M, Packirisamy M, Geitmann A. Measuring the growth force of invasive plant  
386 cells using Flexure integrated Lab-on-a-Chip (FiLoC). *Technology.* **6**, 101-109 (2018).
- 387 31. Moreno Flores S, Toca-Herrera JL. The new future of scanning probe microscopy:  
388 Combining atomic force microscopy with other surface-sensitive techniques, optical  
389 microscopy and fluorescence techniques. *Nanoscale.* **1**, 40-9 (2009).
- 390 32. Suelmann R, Sievers N, Fischer R. Nuclear traffic in fungal hyphae: *in vivo* study of nuclear  
391 migration and positioning in *Aspergillus nidulans*. *Mol. Microbiol.* **25**, 757-769 (1997).
- 392 33. Machida M, Yamada O, Gomi K. Genomics of *Aspergillus oryzae*: learning from the history  
393 of Koji mold and exploration of its future. *DNA Res.* **15**, 173-83 (2008).
- 394 34. Yasui M, Oda K, Masuo S, Hosoda S, Katayama T, Maruyama J, Takaya N, Takeshita N.  
395 Invasive growth of *Aspergillus oryzae* in rice koji and increase of nuclear number.  
396 *Fungal Biol. Biotech.* **7**, 8 (2020).

- 397 35. Takeshita N, Manck R, Grün N, de Vega SH, Fischer R. Interdependence of the actin and  
398 the microtubule cytoskeleton during fungal growth. *Curr. Opin. Microbiol.* **20**, 34-41  
399 (2014).
- 400 36. Ramos-Garcia SL, Roberson RW, Freitag M, Bartnicki-Garcia S, Mourino-Perez RR.  
401 Cytoplasmic bulk flow propels nuclei in mature hyphae of *Neurospora crassa*. *Eukaryot.*  
402 *Cel.* **8**, 1880-1890 (2009).
- 403 37. Sanchez-Leon E, Verdín J, Freitag M, Roberson RW, Bartnicki-Garcia S, Riquelme M. Traffic  
404 of chitin synthase 1 (CHS-1) to the Spitzenkörper and developing septa in hyphae of  
405 *Neurospora crassa*: actin dependence and evidence of distinct microvesicle  
406 populations. *Eukaryot. Cell.* **10**, 683-695 (2011).
- 407 38. Dean R, Van Kan JA, Pretorius ZA, Hammond-Kosack KE, Di Pietro A, Spanu PD, Rudd JJ,  
408 Dickman M, Kahmann R, Ellis J, Foster GD. The Top 10 fungal pathogens in molecular  
409 plant pathology. *Mol. Plant Pathol.* **13**, 414-30 (2012).
- 410 39. Fukada F, Kubo Y. *Colletotrichum orbiculare* regulates cell cycle G1/S progression via a  
411 two-component GAP and a GTPase to establish plant infection. *Plant Cell.* **27**, 2530-  
412 2544 (2015).
- 413 40. Meussen BJ, de Graaff LH, Sanders JP, Weusthuis RA. Metabolic engineering of *Rhizopus*  
414 *oryzae* for the production of platform chemicals. *Appl. Microbiol. Biotechnol.* **94**, 875-  
415 86 (2012).
- 416 41. Kamada T. Molecular genetics of sexual development in the mushroom *Coprinus cinereus*.  
417 *Bioessays.* **24**, 449-59 (2002).
- 418 42. Kiss E, Hegedüs B, Virágh M, Varga T, Merényi Z, Kószó T, Bálint B, Prasanna AN, Krizsán K,  
419 Kocsubé S, Riquelme M, Takeshita N, Nagy LG. Comparative genomics reveals the  
420 origin of fungal hyphae and multicellularity. *Nat. Commun.* **10**, 4080 (2019).

- 421 43. Köhli M, Galati V, Boudier K, Roberson RW, Philippsen P. Growth-speed-correlated  
422 localization of exocyst and polarisome components in growth zones of *Ashbya gossypii*  
423 hyphal tips. *J. Cell Sci.* **121**, 3878-89 (2008).
- 424 44. Treseder KK, Lennon JT. Fungal traits that drive ecosystem dynamics on land. *Microbiol.*  
425 *Mol. Biol. Rev.* **79**, 243-62 (2015).
- 426 45. Perez R, Luccioni M, Kamakaka R, Clamons S, Gaut N, Stirling F, Adamala KP, Silver PA,  
427 Endy D. Enabling community-based metrology for wood-degrading fungi. *Fungal Biol.*  
428 *Biotechnol.* **7**, 2 (2020).
- 429 45. Meyer V, Andersen MR, Brakhage AA, Braus GH, Caddick MX, Cairns TC, de Vries RP,  
430 Haarmann T, Hansen K, Hertz-Fowler C, Krappmann S, Mortensen UH, Peñalva MA,  
431 Ram AFJ, Head RM. Current challenges of research on filamentous fungi in relation to  
432 human welfare and a sustainable bio-economy: a white paper. *Fungal Biol. Biotechnol.*  
433 **3**, 6 (2016).
- 434 47. Oda K, Kakizono D, Yamada O, Iefuji H, Akita O, Iwashita K. Proteomic analysis of  
435 extracellular proteins from *Aspergillus oryzae* grown under submerged and solid-state  
436 culture conditions. *Appl. Environ. Microbiol.* **72**, 3448-57 (2006).
- 437 48. Gow NA, van de Veerdonk FL, Brown AJ, Netea MG. *Candida albicans* morphogenesis and  
438 host defence: discriminating invasion from colonization. *Nat. Rev. Microbiol.* **10**, 112-  
439 22 (2011).
- 440 49. Rodriguez RJ, White JF Jr, Arnold AE, Redman RS. Fungal endophytes: diversity and  
441 functional roles. *New phytol.* **182**, 314-30 (2009).
- 442 50. Hill TW, Kafer E. Improved protocols for *Aspergillus* minimal medium: Trace element and  
443 minimal medium salt stock solutions. *Fungal Genet. Newsl.* **48**, 20-21 (2001).
- 444

445

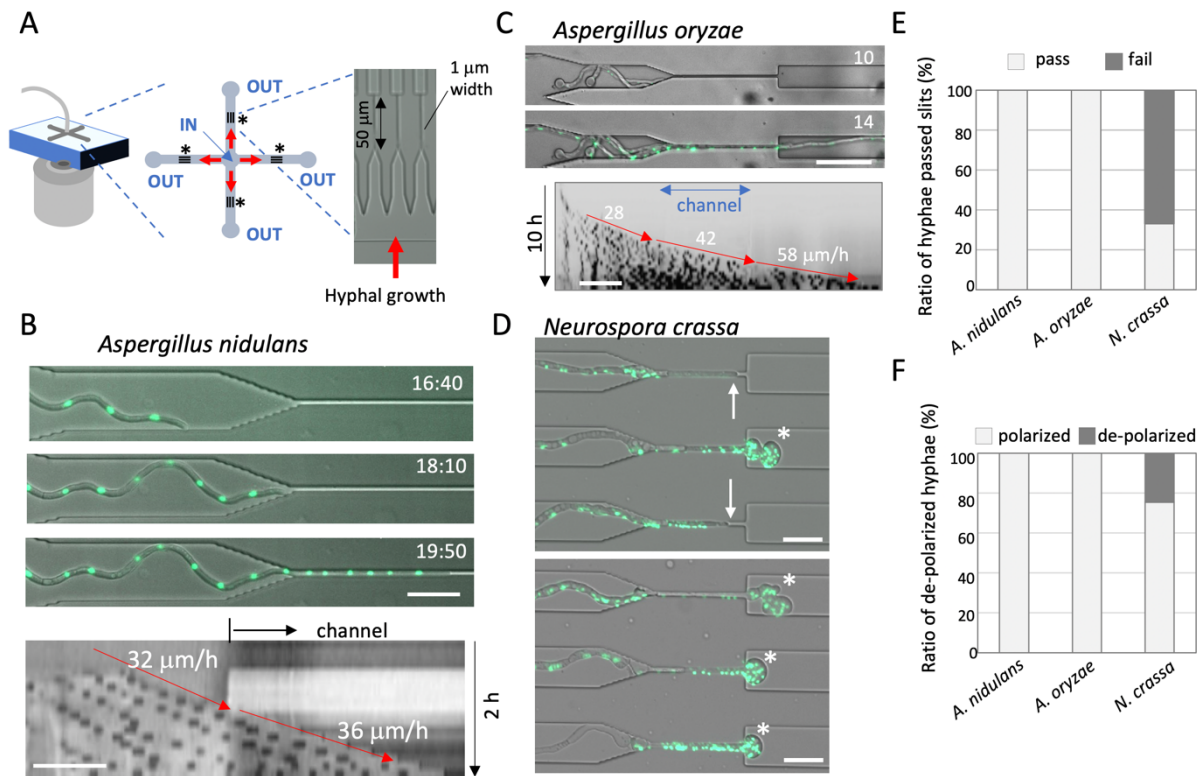

446

447

448

449 **Fig. 1. *A. nidulans* and *A. oryzae* but not *N. crassa* hyphae passed through the channels. (A)**

450 A design of microfluidic device; Inflow at the center “IN” and outflows at the four path ends

451 “OUT”. Twenty channels of 1 μm width and 50 μm length were designed between the inlet

452 and outlet per one path (asterisks). (B) Time series showing a hypha of *A. nidulans* (nuclei

453 labeled with GFP) growing into the channel. The elapsed time is given in hours:minutes.

454 Kymograph along the growth axis before and in the channel from Movie S1. The hyphal

455 elongation rates before and in the channel are shown by arrows. Total 2 h, scale bar: 20 μm.

456 (C) Time series showing a hypha of *A. oryzae* (nuclei labeled with GFP) hypha passed through

457 the channel. The elapsed time is given in hours. Kymograph along the growth axis before, in

458 and after the channel from Movie S2. Total 10 h, scale bar: 20 μm. (D) Images of *N. crassa*

459 (nuclei labeled with GFP) hyphae stopped growing in the channels (arrows) and de-polarized

460 hyphae exiting from the channels (asterisks) from Movie S3, scale bar: 20 μm. (E) Ratio of the

461 hyphae that successfully passed through the channels (pass) or stopped in or exiting from the

462 channels (fail) in *A. nidulans*, *A. oryzae* and *N. crassa*. n=50, respectively. (F) Ratio of polarized

463 or de-polarized hyphae that passed through the channels in *A. nidulans*, *A. oryzae* and *N.*

464 *crassa*. n=50, respectively.

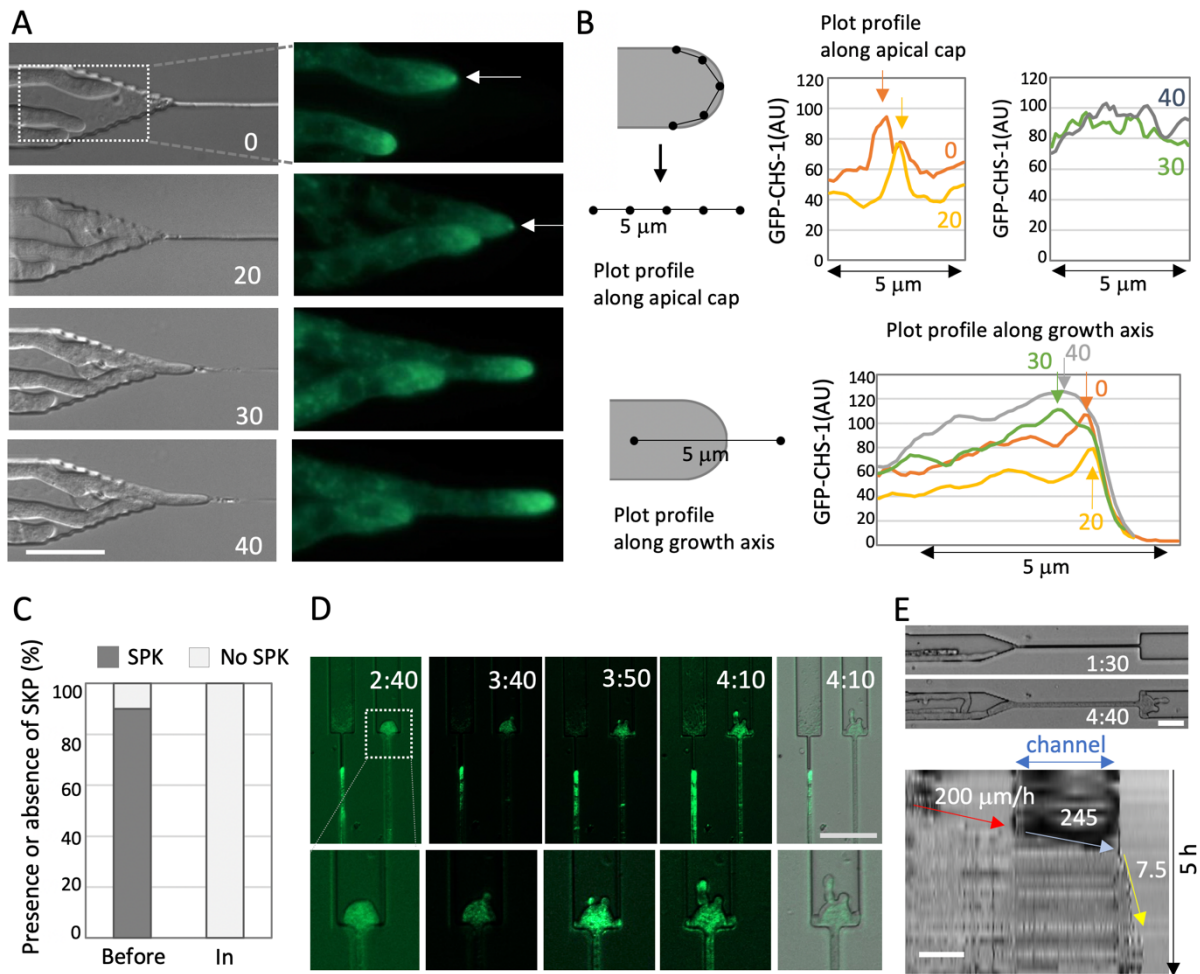

465

466 **Fig. 2. Cell polarity and septum formation during confined growth in *N. crassa*.** (A) Time  
 467 series images of *N. crassa* (DIC; left, CHS-1-GFP; right) hyphae growing into a channel from  
 468 Movie S4. The arrows indicate the SPK. The elapsed time is given in minutes. Scale bar: 20  $\mu$ m.  
 469 (B) Scheme to measure GFP signal intensity along the apical membrane (upper) or the growth  
 470 axis (lower). The plot profile along the apical membrane (upper) indicates the signal intensity  
 471 peaks of the SPK (arrows) at 0, 20 min, but not at 30, 40 min. The plot profile along the growth  
 472 axis (lower) indicates the peaks at the apex of hyphae at 0, 20 min, but at the sub-apex at 30,  
 473 40 min. (C) Ratio of presence or absence of SPK in hyphae before or in channels. n=20, 10. (D)  
 474 Image sequence of the de-polarized hypha after exiting the channel in the *N. crassa* (CHS-1-  
 475 GFP) hypha from Movie S5. The elapsed time is given in hours:minutes. Scale bar: 50  $\mu$ m. (E)  
 476 Kymographs along the growth axis of the channel from Movie S5. The hyphal elongation rates  
 477 before entering, through and after exiting the channel are shown by arrows. Total 5 h, scale  
 478 bar: 50  $\mu$ m.

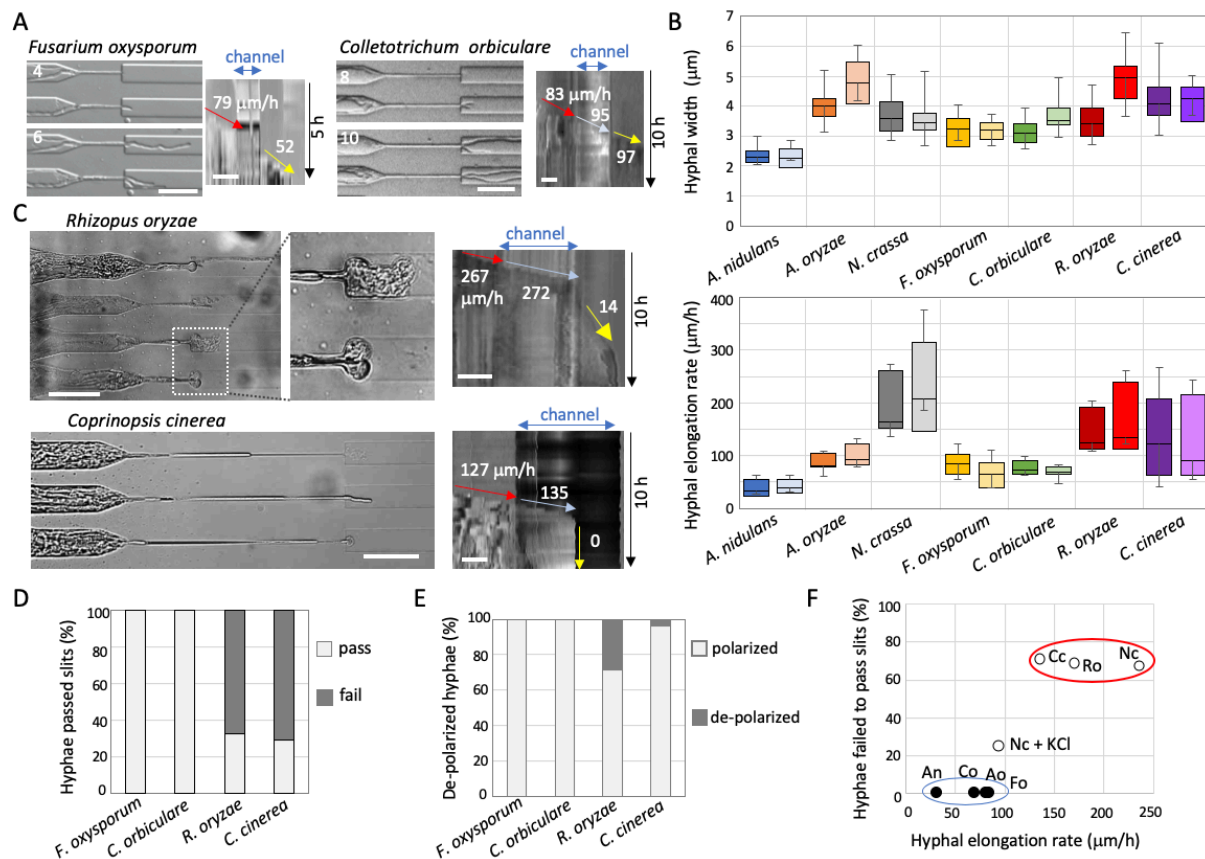

479

480

481

482

483

484

485

486

487

488

489

490

491

492

493

494

495

496

**Fig. 3. Relationships among hyphal width, growth rate and polarity maintenance.** (A) Time series of *F. oxysporum* (left) and *C. orbiculare* (right) hyphae that passed through the channel (from Movies S6, 7). The elapsed time is given in hours. Kymographs along the growth axis of the channel from Movie S10 and S11. The hyphal elongation rates before entering and after exiting the channel are shown by arrows. Total 5 h (left) and 10 h (right), scale bar: 50  $\mu\text{m}$ . (B) Boxplots of hyphal width (upper) and hyphal elongation rate (lower) in *A. nidulans*, *A. oryzae*, *N. crassa*, *F. oxysporum*, *C. orbiculare*, *R. oryzae* and *C. cinerea* before entering the channels (dark color) and after exiting the channels (light color).  $n=26, 40, 80, 53, 45, 14, 20, 80$  (upper),  $n=20$  (lower). De-polarized hyphae were not counted. (C) Images of de-polarized hyphae of *R. oryzae* (upper) and of *C. cinerea* hyphae that stopped growing in the channel or after exiting the channel (lower), from Movies S8, 9. Kymograph along the growth axis of the channel. Total 10 h, scale bars: 50  $\mu\text{m}$ . Scale bars: 20  $\mu\text{m}$ . (D, E) Ratio of the hyphae that successfully passed through the channel (pass) or stopped in or just after exiting the channels (fail) (D), and ratio of de-polarized hyphae after exiting the channels (E) in *F. oxysporum*, *C. orbiculare*, *R. oryzae* and *C. cinerea*.  $n=29, 20, 52, 52$ , respectively. (F) Correlation between the hyphal elongation rate with the growth defect in channels. Two groups are shown by red or blue ellipses.

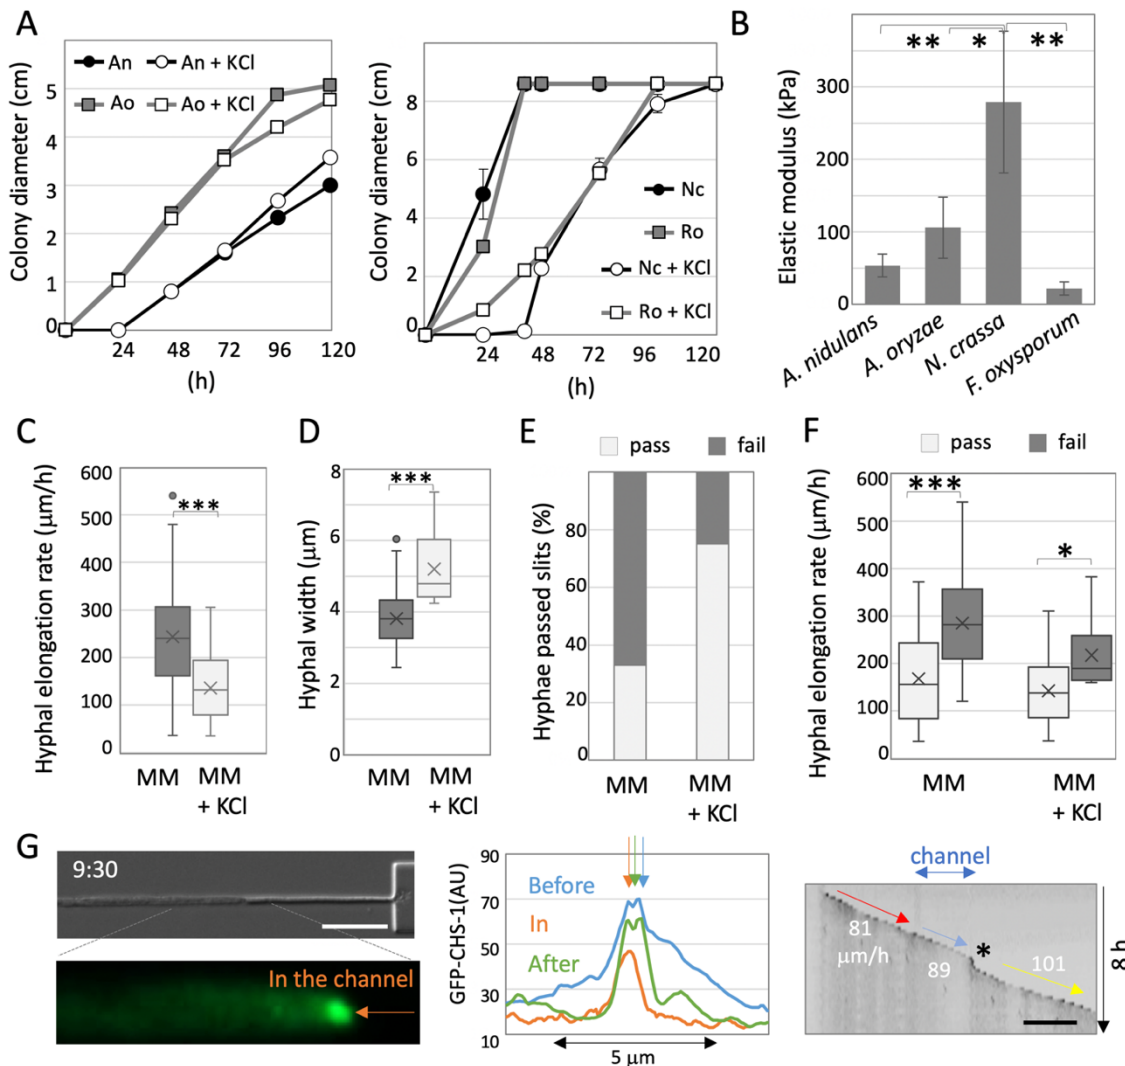

497  
 498 **Fig. 4. Contribution of growth rate for polarity maintenance.** (A) Colony diameter of *A.*  
 499 *nidulans* and *A. oryzae* (left), *N. crassa* and *R. oryzae* (right) on MM or MM + 0.6 M KCl plates.  
 500 (B) Elastic modulus measured by a scanning probe microscope in the hyphae of *A. nidulans*,  
 501 *A. oryzae*, *N. crassa* and *F. oxysporum* grown in MM. Error bar: S.D.,  $n = 9$  in 3 hyphae,  $** P \leq$   
 502  $0.01$ ,  $* P \leq 0.05$ . (C) Hyphal elongation rate of *N. crassa* hyphae grown in MM and MM + 0.6  
 503 M KCl. Error bar: S.D.,  $n = 20$ ,  $*** P \leq 0.001$ . (D) Hyphal width of *N. crassa* grown in MM and  
 504 MM + 0.6 M KCl. Error bar: S.D.,  $n = 20$ ,  $*** P \leq 0.001$ . (E) Ratio of the hyphae that successfully  
 505 passed through the channel (pass) or stopped within or just after exiting the channels (fail) in  
 506 *N. crassa* grown in MM or MM + 0.6 M KCl.  $n = 53, 32$ . (F) Boxplots of hyphal elongation rate  
 507 in *N. crassa* hyphae just before entering the channel, pass or fail, grown in MM or MM + 0.6  
 508 M KCl.  $n = 18, 33, 18, 9$ .  $*** P \leq 0.001$ .  $* P \leq 0.05$ . (G) Image of a *N. crassa* hypha (SPK labeled  
 509 with GFP) growing within the channel; from Movie S15. The arrow indicates the SPK. The  
 510 elapsed time is given in hours:minutes. Scale bar: 20  $\mu\text{m}$ . The plot profile along the apical  
 511 membrane indicated the signal peaks of SPK (arrows) before, in and after the channel, see Fig.  
 512 S4. Kymograph of GFP signal along the growth axis from Movie S10. Total 8 h, scale bar: 100  
 513  $\mu\text{m}$ . The hyphal elongation rates before entering and after exiting the channel are shown by  
 514 arrows.

515

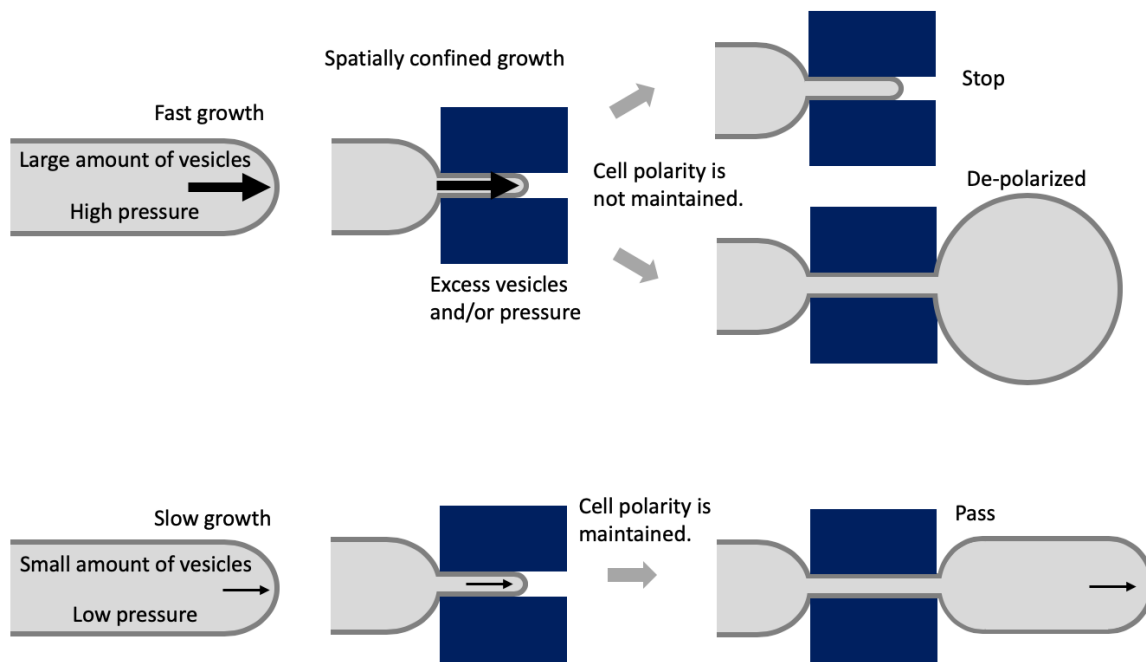

516

517

518 **Fig. 5. Relationship of growth rate and spatially confined hyphal growth to maintain cell**

519 **polarity.** Cartoon representation of trade-off between cell polarity and growth in spatially

520 confined growth, and how they are correlated and act cooperatively to determine cell

521 shape.

522

523



524

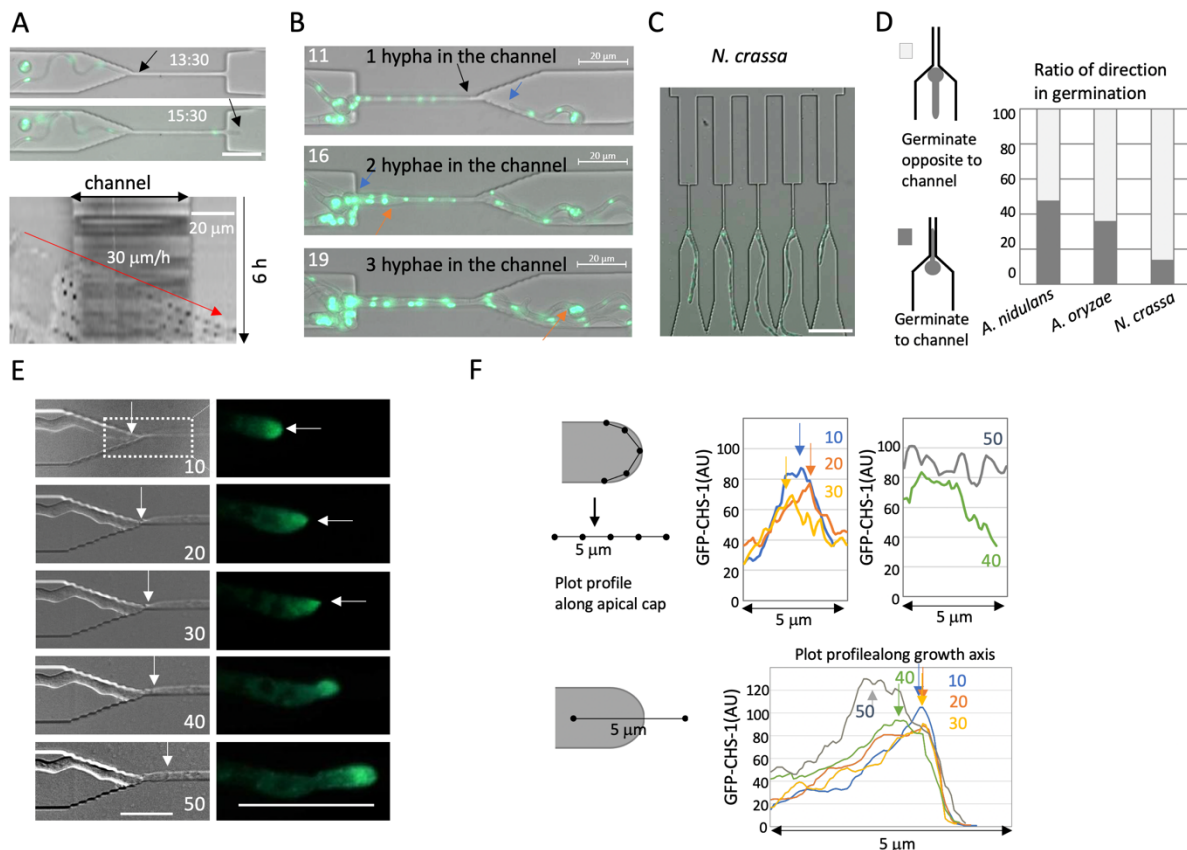

525

526

527 **Fig. S1. *A. nidulans* but not *N. crassa* hyphae passed through the channels.** (A) Time series

528 showing a hypha of *A. nidulans* (nuclei labeled with GFP) growing into the channel.

529 Kymograph along the growth axis before, in and after the channel from Movie S1. The hyphal

530 elongation rates are shown by an arrow. Total 6 h, scale bar: 20  $\mu$ m. (B) Time series of *A.*

531 *nidulans* (nuclei labeled with GFP) two or three hyphae passed through the same channel, see

532 Movie S1. Each hyphal tip is shown by arrows. Scale bars: 20  $\mu$ m. (C) Image of the *N. crassa*

533 spores germinated to the opposite side of slits. (D) Ratio of direction in germination toward

534 or opposite to channels in *A. nidulans*, *A. oryzae* and *N. crassa*. n=50, respectively. (E) Time

535 series images of *N. crassa* (DIC; left, CHS-1-GFP; right) hyphae growing into a channel from

536 Movie S8. The arrows indicate the SPK. The elapsed time is given in minutes. Scale bar: 20  $\mu$ m.

537 (F) The plot profile along the apical membrane indicated the signal peaks of SPK (arrows) at

538 10, 20, 30 min, but not at 40, 50 min. The plot profile along the growth axis (right) indicated

539 the peaks at the apex of hyphae at 10, 20, 30 min, but at the sub-apex at 40, 50 min.

540

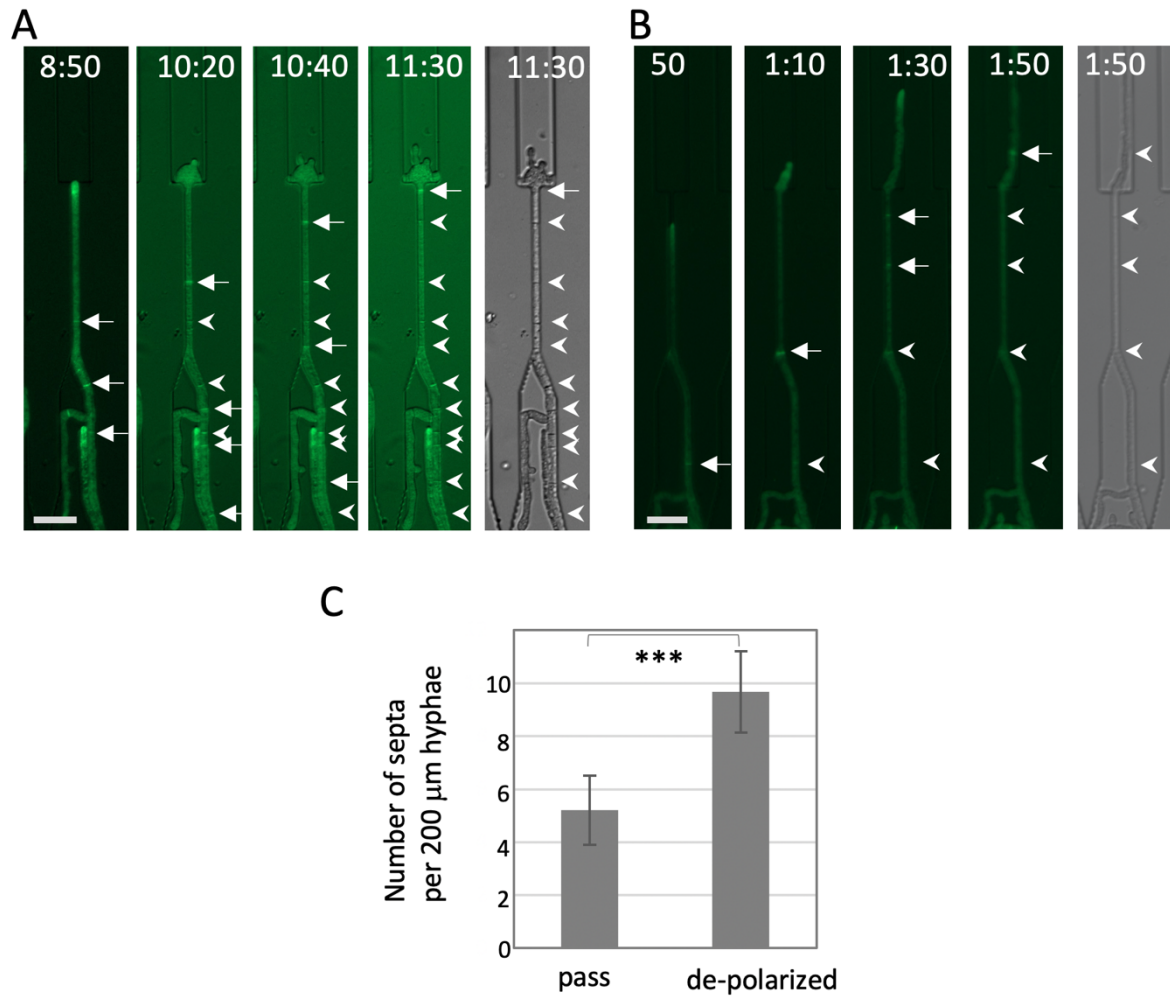

541

542 **Fig. S2. Increased number of septa in de-polarized hyphae.** (A, B) Image sequence of forming  
543 septa (arrows) and formed septa (arrow heads) in the de-polarized hypha through the channel  
544 (A) and in the hypha through the channel (B). The elapsed time is given in hours:minutes.

545 Scale bar: 20  $\mu\text{m}$ . (C) Number of septa in 200  $\mu\text{m}$ -hyphae around the channel, in the hyphae  
546 that passed the channels or in the de-polarized hyphae. Error bar: S.D., n = 5, \*\*\* P  $\leq$  0.001.

547

548

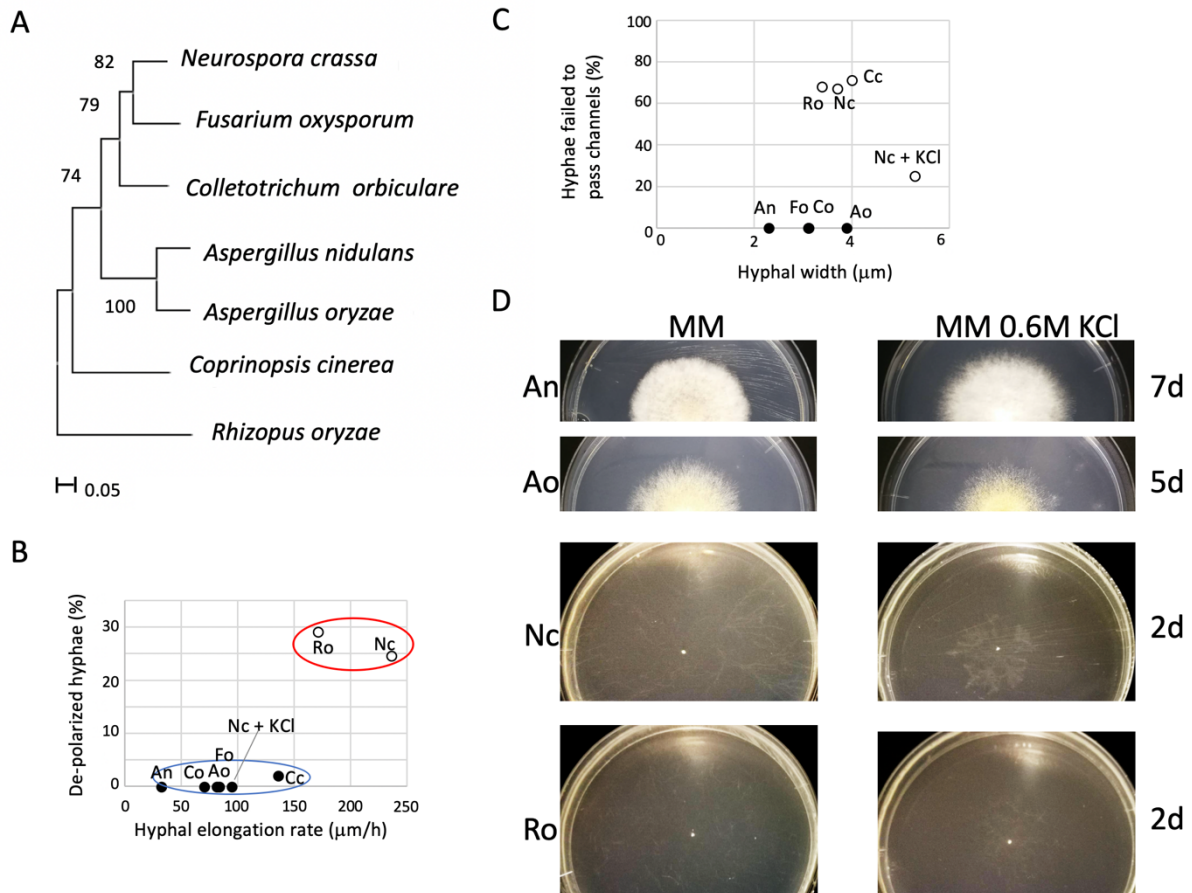

549  
550  
551  
552  
553  
554  
555  
556  
557  
558  
559  
560

**Fig. S3. Phylogenetic tree and growth on the plates.** (A) Phylogenetic tree of filamentous fungi used in this study. Maximum likelihood (ML) tree obtained from the ITS1 and ITS2 regions of the fungal strains. The bootstrap consensus inferred from 100 replicates. (B) Correlation between the hyphal elongation rate and depolarized hyphae. Two groups are shown by red or blue ellipses. (C) No correlation between the hyphal width with the growth defect in channels. (D) Colonies of An; *A. nidulans*, Ao; *A. oryzae*, Nc; *N. crassa* and Ro; *R. oryzae* growth on minimal media (MM) plates or MM + 0.6M KCl plates for 2-7 days.

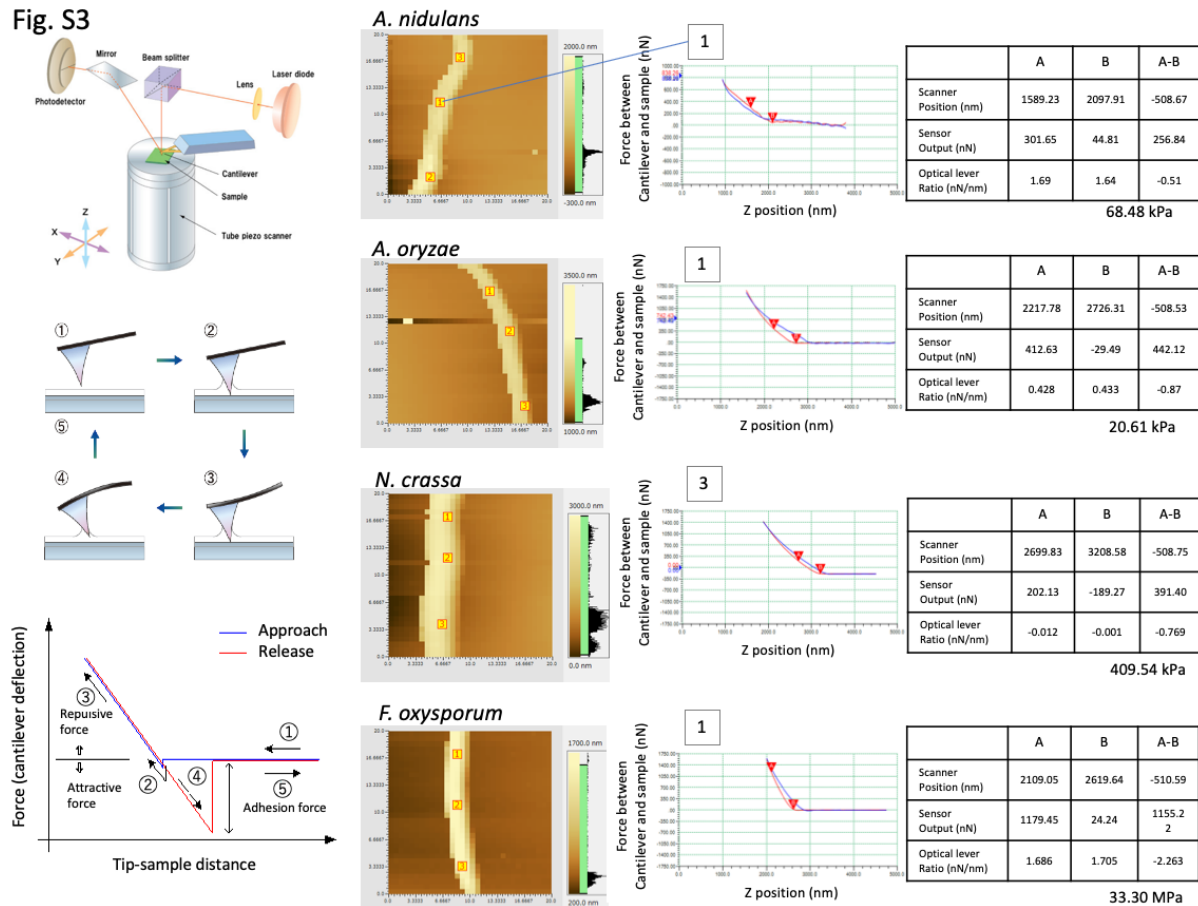

561  
562  
563  
564  
565  
566  
567  
568  
569  
570  
571  
572  
573  
574  
575  
576  
577  
578  
579  
580  
581

**Fig. S4. Elastic modulus measurement by a scanning probe microscope (SPM).** The principle of SPM equipment is composed of the following three. One, laser diode and photo detector. Two, cantilever and holder. Three, scanner\*. The basis of the force curve measurement is the measurement performed at one point of the sample. As the distance of the probe changes relative to the sample, this distance can be plotted on the horizontal axis, as shown on the graph. Also, it is possible to calculate from the spring constant of the cantilever and plot this on the vertical axis as nN. When the probe and sample distance is faraway, the force does not work, hence the vertical axis is ①. When the Cantilever touches the sample it is ②. After that, the slope of the graph when the repulsive force acts reflects the hardness of the sample shown as ③. When a release-curve is observed often a large attractive area can be seen. This is because the probe is caught by the adsorption layer on the sample surface shown as ④. From this approach-curve and release-curve, Young's modulus can be calculated using JKR or Hertz. Therefore, by saving the data at each pixel, a mapping image can be constructed. Fungal cells are grown in a non-invasive manner at high magnifications.

\*<http://www.shimadzu.com/an/surface/spm/faq/index.html>

Fig. S5

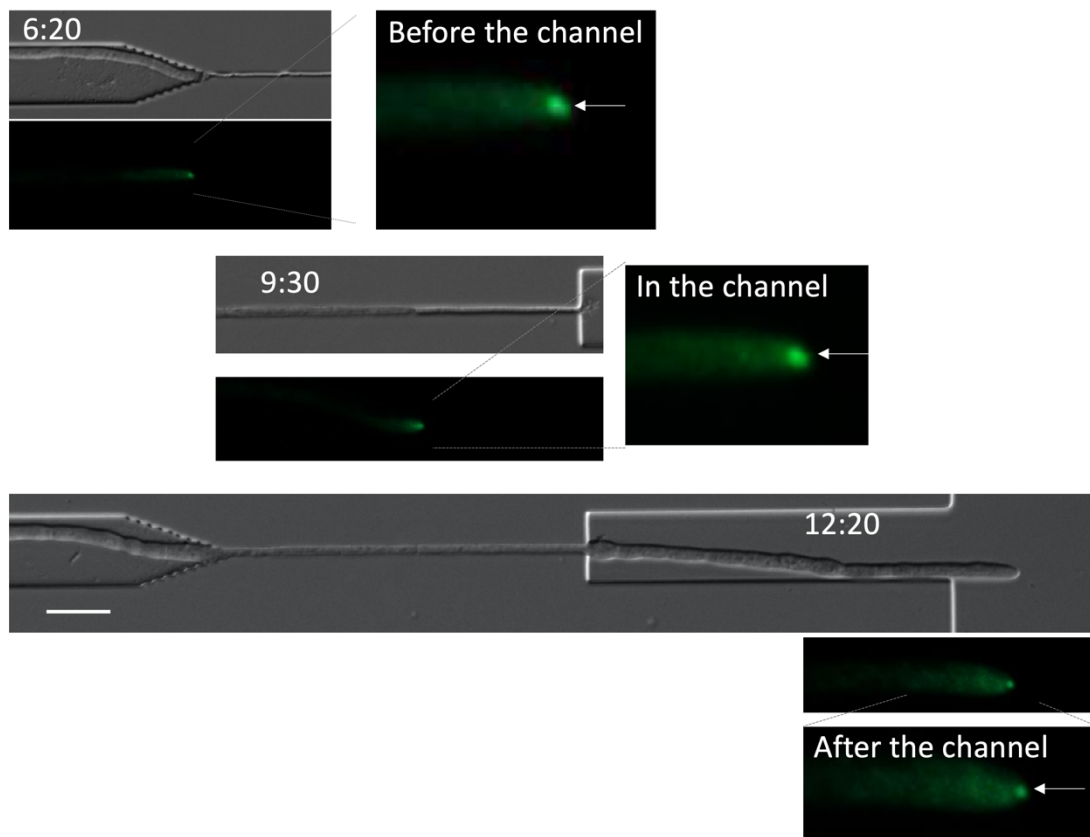

582

583

584 **Fig. S5. SPK of *N. crassa* hypha grown in MM KCl.** Images of the *N. crassa* (SPK labeled with  
585 GFP) hypha in the channel from Movie S10. The arrow indicates the SPK before, in and after  
586 the channel. The elapsed time is given in hours:minutes. Scale bar: 20  $\mu$ m.

587

588 Table S1. strains used in this study

| Strain                                         | Genotype                                                                | Source                                 |
|------------------------------------------------|-------------------------------------------------------------------------|----------------------------------------|
| <i>Aspergillus nidulans</i> SRS27              | <i>gpdA</i> promoter GFP fused StuA-NLS                                 | 1                                      |
| <i>Aspergillus oryzae</i> RIB40UtH2BG          | RIB40Δn (pUtH2BG)                                                       | 2                                      |
| <i>Neurospora crassa</i> N22813A               | <i>mat A his-3<sup>+</sup>::Pccg-1-hH1<sup>+</sup>-sgfp<sup>+</sup></i> | 3                                      |
| <i>Neurospora crassa</i> NES1-15               | <i>mat A his-3<sup>+</sup>::Pccg-1::chs-1::sgfp<sup>+</sup></i>         | 4                                      |
| <i>Fusarium oxysporum</i> JCM11502             | Wild type                                                               | JCM: Japan Collection of Microorganims |
| <i>Colletotrichum orbiculare</i> 104-T         | Histone H1-GFP                                                          | 5                                      |
| <i>Rhizopus oryzae</i> JCM5582                 | Wild type                                                               | JCM                                    |
| <i>Coprinopsis cinerea</i><br>#2 + #8 dikaryon | A3B1 + A2B2                                                             | 6, 7                                   |

589

- 590 1. Suelmann R, Sievers N, Fischer R (1997) Nuclear traffic in fungal hyphae: *in vivo* study of  
591 nuclear migration and positioning in *Aspergillus nidulans*. *Mol Microbiol.* **25**:757-769.
- 592 2. Yasui M, Oda K, Masuo S, Hosoda S, Katayama T, Maruyama J, Takaya N, Takeshita N  
593 (2020) Invasive growth of *Aspergillus oryzae* in rice koji and increase of nuclear number.  
594 *Fungal Biol Biotech.* In press.
- 595 3. Ramos-Garcia SL, Roberson RW, Freitag M, Bartnicki-Garcia S, Mourino-Perez RR (2009)  
596 Cytoplasmic bulk flow propels nuclei in mature hyphae of *Neurospora crassa*. *Eukaryot*  
597 *Cel.* **8**:1880-1890
- 598 4. Sanchez-Leon E, Verdín J, Freitag M, Roberson RW, Bartnicki-Garcia S, Riquelme M (2011)  
599 Traffic of chitin synthase 1 (CHS-1) to the Spitzenkörper and developing septa in hyphae  
600 of *Neurospora crassa*: actin dependence and evidence of distinct microvesicle populations.  
601 *Eukaryot Cell.* **10**:683-695.
- 602 5. Fukada F, Kubo Y (2015) *Colletotrichum orbiculare* regulates cell cycle G1/S progression  
603 via a two-component GAP and a GTPase to establish plant infection. *Pant Cell.* **27**:2530-  
604 2544.

- 605 6. Stajich JE, et al (2010) Insights into evolution of multicellular fungi from the assembled  
606 chromosomes of the mushroom *Coprinopsis cinerea* (*Coprinus cinereus*). *Proc Natl Acad*  
607 *Sci USA*. **107**:11889–11894.
- 608 7. Masuda R, Iguchi N, Tukuta K, Nagoshi T, Kemuriyama K, Muraguchi H (2016) The  
609 *Coprinopsis cinerea* Tup1 homologue Cag1 is required for gill formation during fruiting  
610 body morphogenesis. *Biol Open*. **5**:1844-1852.

611

612

613

614

615 Movie Legends

616

617 Movie S1. *Aspergillus nidulans* strain whose nuclei were visualized by GFP grew into, through  
618 and out of the channels. Every 10 min, total 10h, scale bar: 20  $\mu\text{m}$ .

619

620 Movie S2. *Aspergillus oryzae* strain whose nuclei were visualized by GFP grew into, through  
621 and out of the channels. Every 20 min, total 14h, scale bar: 50  $\mu\text{m}$ .

622

623 Movie S3. *Neurospora crassa* strain whose nuclei were visualized by GFP often showed de-  
624 polarized hyphae out of the channels. Every 5 min, total 20 h, scale bar: 20 or 50  $\mu\text{m}$ .

625

626 Movie S3. *Neurospora crassa* strain whose nuclei were visualized by GFP often showed de-  
627 polarized hyphae out of the channels. Every 5 min, total 20 h, scale bar: 20 or 50  $\mu\text{m}$ .

628

629 Movie S4. *Neurospora crassa* strain expressing GFP-CHS-1 penetrated into the channels then  
630 stopped growing. Every 10 min, total 50 min, scale bar: 20  $\mu\text{m}$ .

631

632 Movie S5. *Neurospora crassa* strain expressing GFP-CHS-1 penetrated into the channels then  
633 showed de-polarized hyphae out of the channels. Every 10 min, total 6 h, scale bar: 20  $\mu\text{m}$ .

634

635 Movie S6. *Fusarium oxysporum* strain grew into, through and out of the channels. Every 20  
636 min, total 7 h, scale bar: 50  $\mu\text{m}$ .

637

638 Movie S7. *Colletotrichum orbiculare* strain grew into, through and out of the channels. Every  
639 20 min, total 16 h, scale bar: 50  $\mu\text{m}$ .

640

641 Movie S8. *Rhizopus oryzae* strain showed de-polarized hyphae out of the channels. Every 10  
642 min, total 15 h, scale bar: 50  $\mu\text{m}$ .

643

644 Movie S9. *Coprinopsis cinerea* dikaryon strain penetrated into the channels then stopped  
645 growing. Every 10 min, total 24 h, scale bar: 50  $\mu\text{m}$ .

646

647 Movie S10. *Neurospora crassa* strain expressing GFP-CHS-1 grew into, through and out of the  
648 channels in the high osmotic condition. Every 10 min, total 15 h, scale bar: 50  $\mu\text{m}$ .

649

650
